# Supplementary material for: Revealing the contributions of homogeneous and heterogeneous catalysis to isomerization of d-glucose into d-fructose in the presence of basic salts with low solubility
Source: Royal Society of Chemistry journal article supplement (doi:10.1039/d2cy00551d), 2022-01-01
Supplement: d2cy00551d1.pdf [file d2cy00551d1.pdf]

## Supporting Information

### Revealing the contributions of homogeneous and heterogeneous catalysis for isomerization of D-glucose into D-fructose in the presence of low soluble basic salts

*Valérie Toussaint<sup>a,b</sup>, and Irina Delidovich<sup>a,b\*</sup>*

*<sup>a</sup>Institute of Chemical, Environmental and Bioscience Engineering, TU Wien, Getreidemarkt 9, 1060 Vienna, Austria.*

*<sup>b</sup>Chair of Heterogeneous Catalysis and Chemical Technology, Institute for Technical and Macromolecular Chemistry, RWTH Aachen University, Worringerweg 2, 52074 Aachen, Germany.*

*\*E-mail: [Irina.delidovich@tuwien.ac.at](mailto:Irina.delidovich@tuwien.ac.at)*

## Table of content

|                                                                                                         |    |
|---------------------------------------------------------------------------------------------------------|----|
| 1. XRD, Nitrogen Physisorption .....                                                                    | 2  |
| 2. pH values generated in the presence of the catalysts in 10 wt.% Glc aqueous solution and water ..... | 5  |
| 3. Kinetic data, pH, and selectivity-conversion curves.....                                             | 6  |
| 4. Filtration and contact tests.....                                                                    | 15 |
| 5. Recycling tests .....                                                                                | 16 |
| 6. References .....                                                                                     | 20 |

## 1. XRD, Nitrogen Physisorption

### XRD

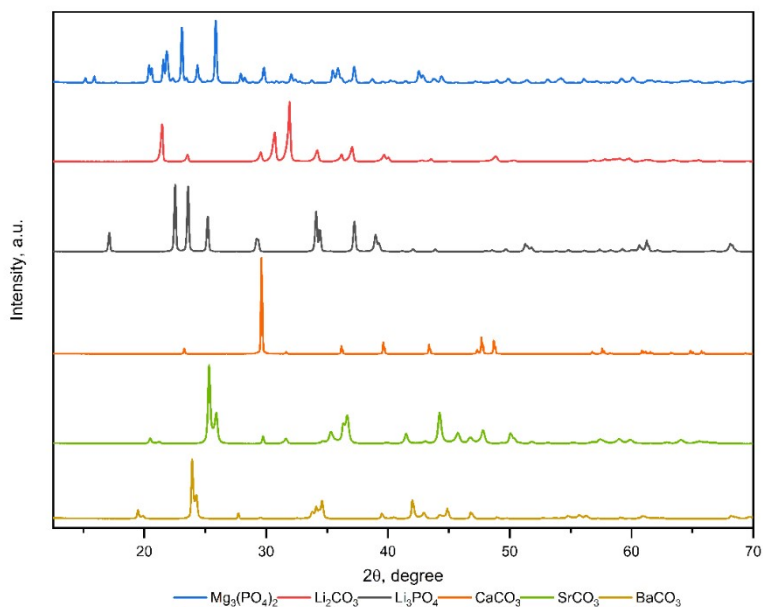

**Figure 1S.** XRD patterns of Mg<sub>3</sub>(PO<sub>4</sub>)<sub>2</sub> (00-033-0876), Li<sub>2</sub>CO<sub>3</sub> (04-008-5839), Li<sub>3</sub>PO<sub>4</sub> (00-025-1030), CaCO<sub>3</sub> (04-002-9082), SrCO<sub>3</sub> (01-074-1491), BaCO<sub>3</sub> (00-005-0378). ICDD (International Centre for Diffraction Data) codes are given in parentheses.

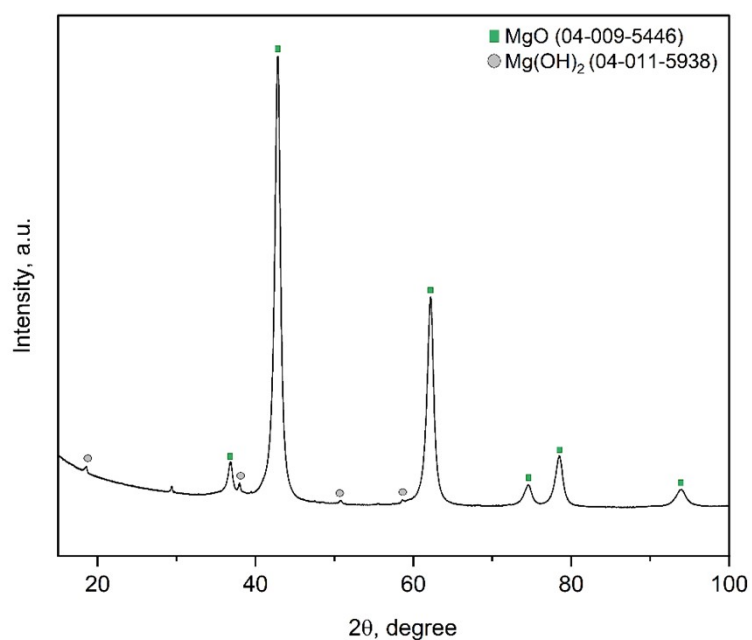

**Figure S2.** XRD pattern of MgO before catalytic test. ICDD (International Centre for Diffraction Data) codes are given in parentheses.

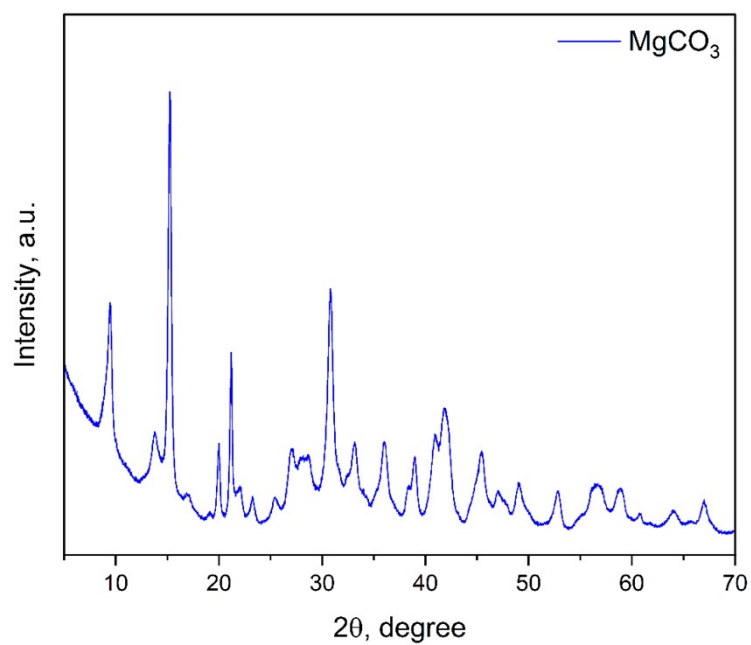

**Figure S3.** XRD pattern of fresh MgCO<sub>3</sub> (04-013-7631). ICDD code is given in parentheses.

**N<sub>2</sub> Physisorption**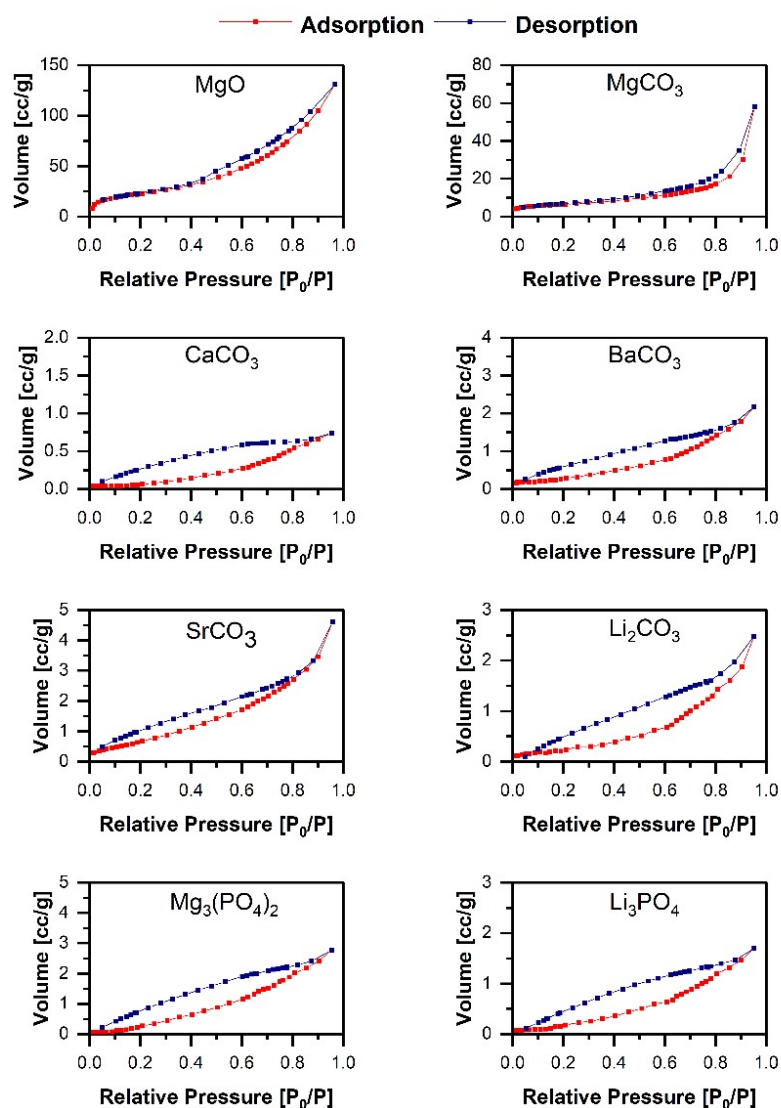**Figure 4S.** N<sub>2</sub> physisorption isotherms of the catalysts.**Table 1S.** Specific surface areas  $S_{\text{BET}}$  and total pore volumes of the catalysts determined by N<sub>2</sub> physisorption.

| Entry | Catalyst                                        | $S_{\text{BET}}$ [m <sup>2</sup> /g] | Total Pore Volume [cc/g] |
|-------|-------------------------------------------------|--------------------------------------|--------------------------|
| 1     | MgO                                             | 82                                   | $2.03 \cdot 10^{-1}$     |
| 2     | SrCO <sub>3</sub>                               | 3                                    | $7.13 \cdot 10^{-3}$     |
| 3     | BaCO <sub>3</sub>                               | 1                                    | $3.35 \cdot 10^{-3}$     |
| 4     | CaCO <sub>3</sub>                               | 0.2                                  | $1.14 \cdot 10^{-3}$     |
| 5     | MgCO <sub>3</sub>                               | 23                                   | $9.00 \cdot 10^{-2}$     |
| 6     | Li <sub>2</sub> CO <sub>3</sub>                 | 0.8                                  | $3.84 \cdot 10^{-3}$     |
| 7     | Li <sub>3</sub> PO <sub>4</sub>                 | 0.8                                  | $2.63 \cdot 10^{-3}$     |
| 8     | Mg <sub>3</sub> (PO <sub>4</sub> ) <sub>2</sub> | 5                                    | $4.28 \cdot 10^{-3}$     |

pH values generated in the presence of the catalysts in 10 wt.% Glc aqueous solution and water

## 2. pH values generated in the presence of the catalysts in 10 wt.% Glc aqueous solution and water

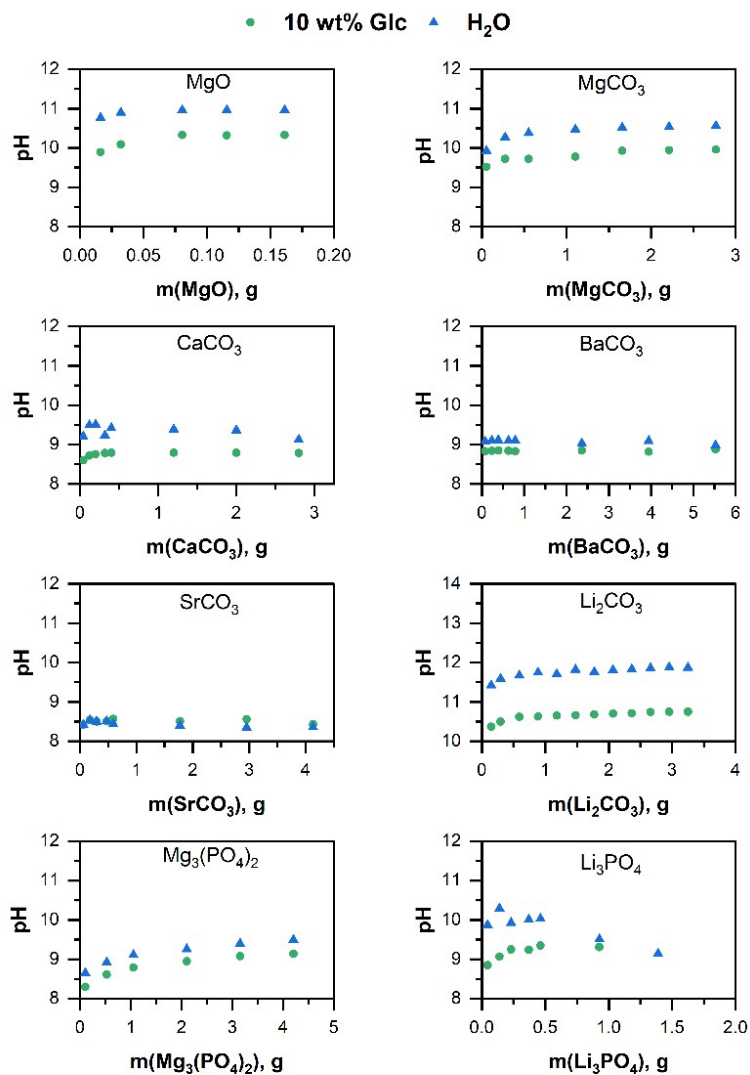

**Figure 5S.** pH of 10 wt.% aqueous Glc solution (green circles) and water (blue triangles) upon variation of solid-to-liquid ratio. Reaction conditions: 500 rpm, 40 mL of water or Glc solution, room temperature.

**Table 2S.** A list of conducted experiments including catalysts, their solubility product constants [1], catalyst loadings, and temperatures. 40 mL 10 wt.% Glc solution, 500 rpm,  $\text{pH}_0$  was measured directly prior to the reaction.

| Entry | Catalyst                     | T, °C | $\text{pH}_0$ | Loading, $\text{g}\cdot\text{mL}^{-1}$ | Solubility product constant ( $K_{\text{sp}}$ ) |
|-------|------------------------------|-------|---------------|----------------------------------------|-------------------------------------------------|
| 1     | $\text{Li}_2\text{CO}_3$     | 60    | 10.6          | 0.022                                  | $8.15\cdot 10^{-4}$                             |
| 2     | $\text{Li}_2\text{CO}_3$     | 80    | 10.5          | 0.022                                  |                                                 |
| 3     | MgO                          | 40    | 10.2          | 0.054                                  | $5.61\cdot 10^{-12}$                            |
| 4     | MgO                          | 60    | 10.2          | 0.004                                  |                                                 |
| 5     | MgO                          | 80    | 10.2          | 0.004                                  |                                                 |
| 6     | $\text{MgCO}_3$              | 60    | 9.7           | 0.042                                  | /                                               |
| 7     | $\text{MgCO}_3$              | 80    | 9.8           | 0.042                                  |                                                 |
| 8     | $\text{Li}_3\text{PO}_4$     | 60    | 9.7           | 0.0116                                 | $2.37\cdot 10^{-11}$                            |
| 9     | $\text{Li}_3\text{PO}_4$     | 80    | 9.7           | 0.0116                                 |                                                 |
| 10    | $\text{SrCO}_3$              | 80    | 8.1           | 0.007                                  | $5.60\cdot 10^{-9}$                             |
| 11    | $\text{BaCO}_3$              | 80    | 8.1           | 0.010                                  | $2.58\cdot 10^{-9}$                             |
| 12    | $\text{Mg}_3(\text{PO}_4)_2$ | 80    | 7.9           | 0.053                                  | $1.04\cdot 10^{-24}$                            |
| 13    | $\text{CaCO}_3$              | 80    | 7.8           | 0.010                                  | $3.36\cdot 10^{-9}$                             |

### 3. Kinetic data, pH, and selectivity-conversion curves

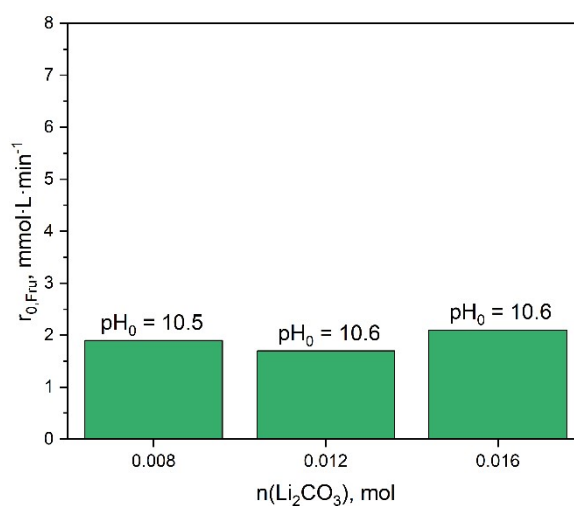

**Figure 6S.** Initial reaction rates  $r_0$  in the presence of  $\text{Li}_2\text{CO}_3$  for various catalyst loadings. Reaction conditions: 40 mL, 10 wt.% Glc aqueous solution, 500 rpm,  $60^\circ\text{C}$ .

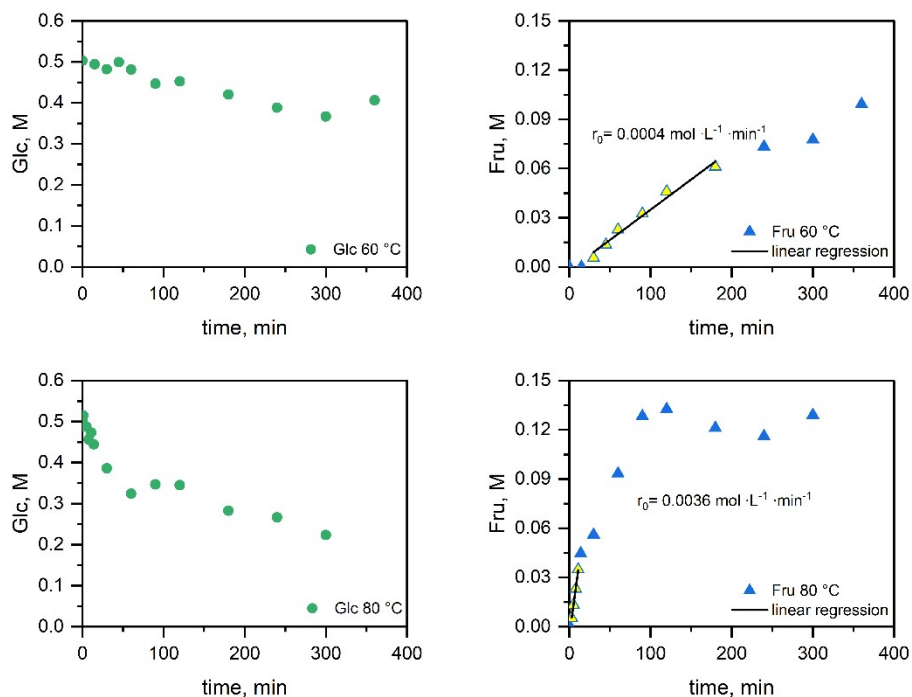

**Figure 7S.** Concentrations of Glc (green circles) and Fru (blue triangles) during the conversion of D-glucose in the presence of MgO at 60 and 80 °C. Reaction conditions: 40 mL 10 wt.% Glc aqueous solution, 4 mmol MgO, 500 rpm, 60 and 80 °C.

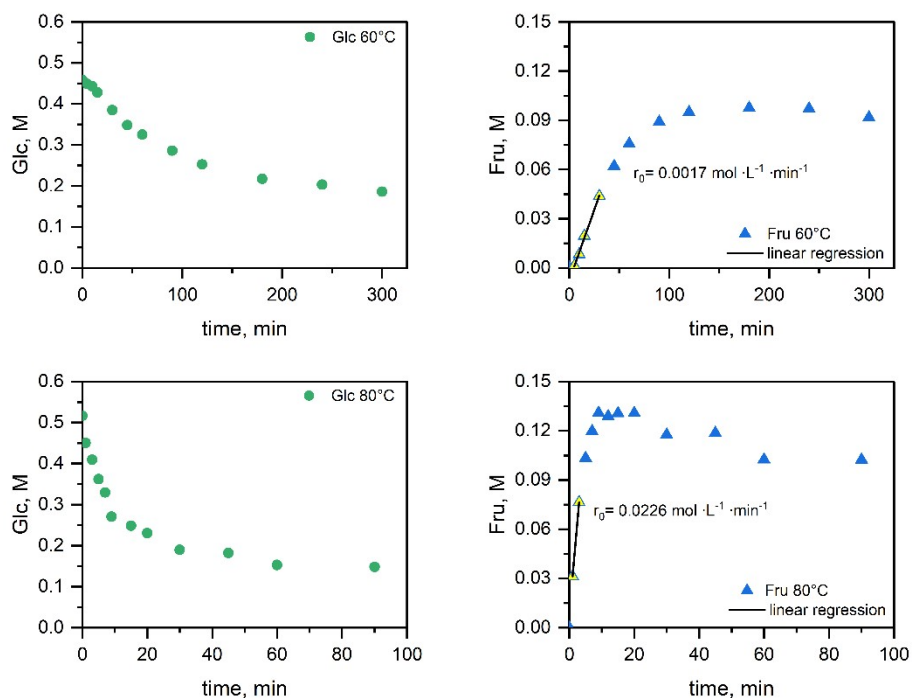

**Figure 8S.** Concentrations of Glc (green circles) and Fru (blue triangles) during the conversion of D-glucose in the presence of  $\text{Li}_2\text{CO}_3$  at 60 and 80 °C. Reaction conditions: 40 mL 10 wt.% Glc aqueous solution, 12 mmol  $\text{Li}_2\text{CO}_3$ , 500 rpm, 60 and 80 °C.



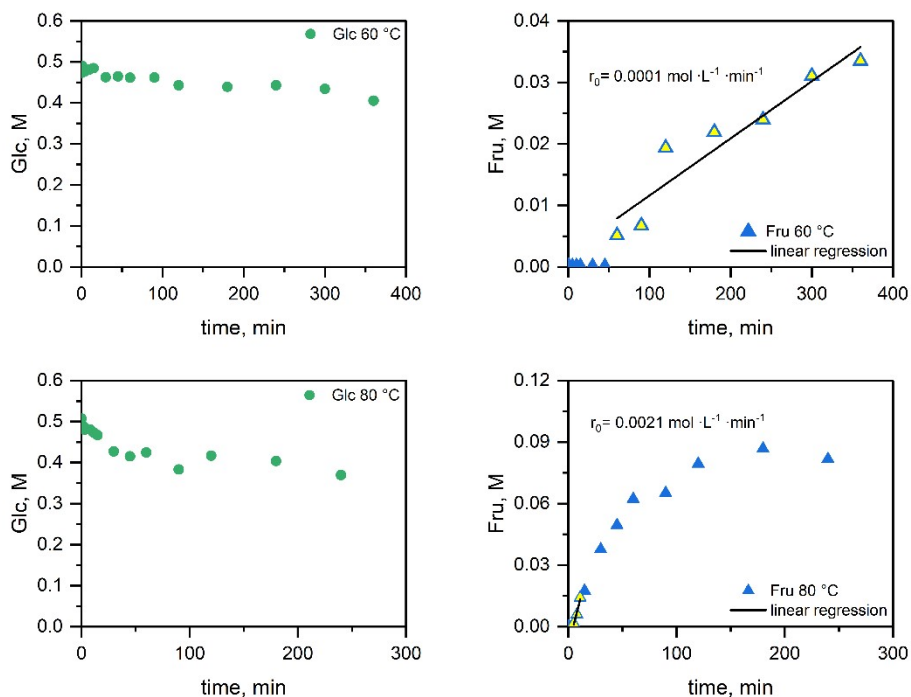

**Figure 9S.** Concentrations of Glc (green circles) and Fru (blue triangles) during the conversion of D-glucose in the presence of  $\text{Li}_3\text{PO}_4$  at 60 and 80 °C. Reaction conditions: 40 mL 10 wt.% Glc aqueous solution, 4 mmol  $\text{Li}_3\text{PO}_4$ , 500 rpm, 60 and 80°C.

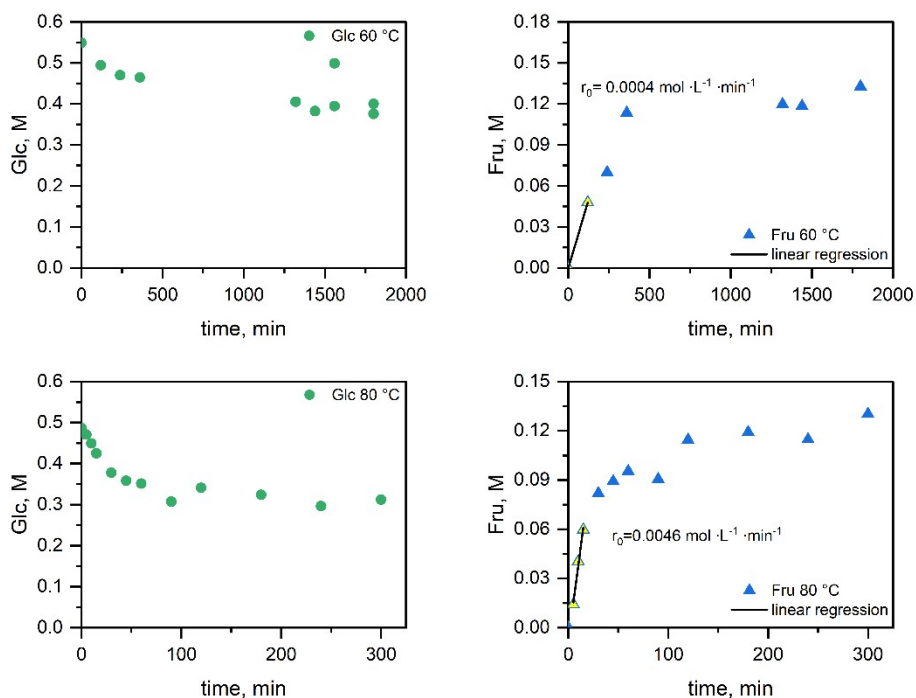

**Figure 10S.** Concentrations of Glc (green circles) and Fru (blue triangles) during the conversion of D-glucose in the presence of  $\text{MgCO}_3$  at 60 and 80 °C. Reaction conditions: 40 mL 10 wt.% Glc aqueous solution, 4 mmol  $\text{MgCO}_3$ , 500 rpm, 60 and 80°C.

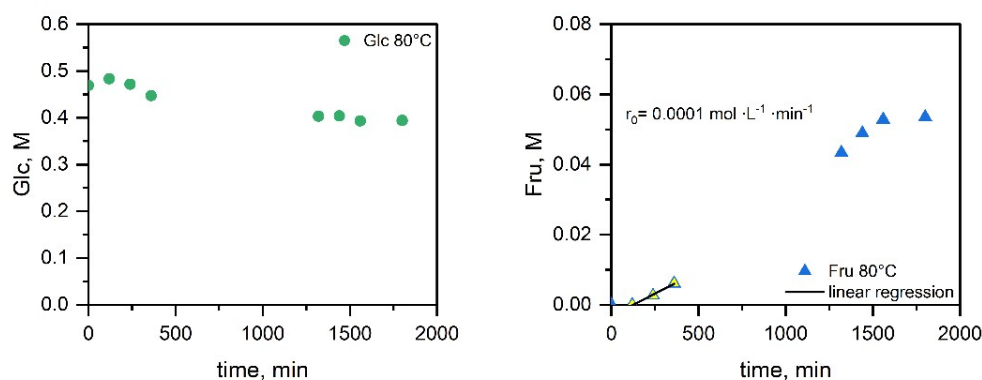

**Figure 11S.** Concentrations of Glc (green circles) and Fru (blue triangles) during the conversion of D-glucose in the presence of  $\text{CaCO}_3$  at 80 °C. Reaction conditions: 40 mL 10 wt.% Glc aqueous solution, 4 mmol  $\text{CaCO}_3$ , 500 rpm, 80°C.

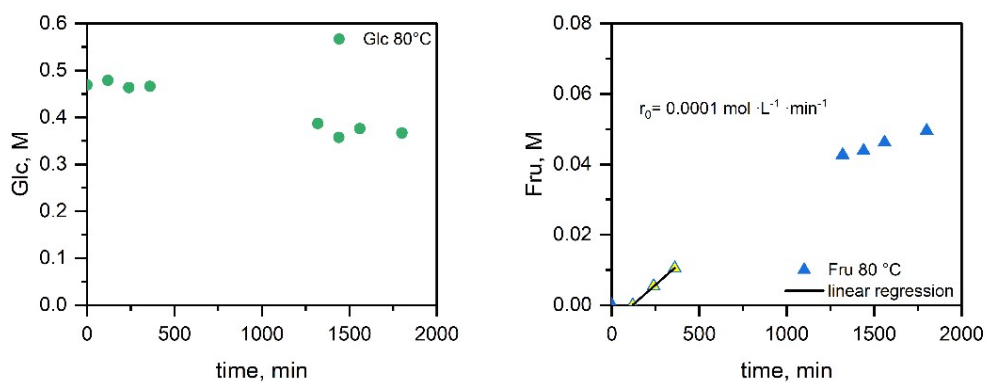

**Figure 12S.** Concentrations of Glc (green circles) and Fru (blue triangles) during the conversion of D-glucose in the presence of  $\text{SrCO}_3$  at 80 °C. Reaction conditions: 40 mL 10 wt.% Glc aqueous solution, 4 mmol  $\text{SrCO}_3$ , 500 rpm, 80°C.

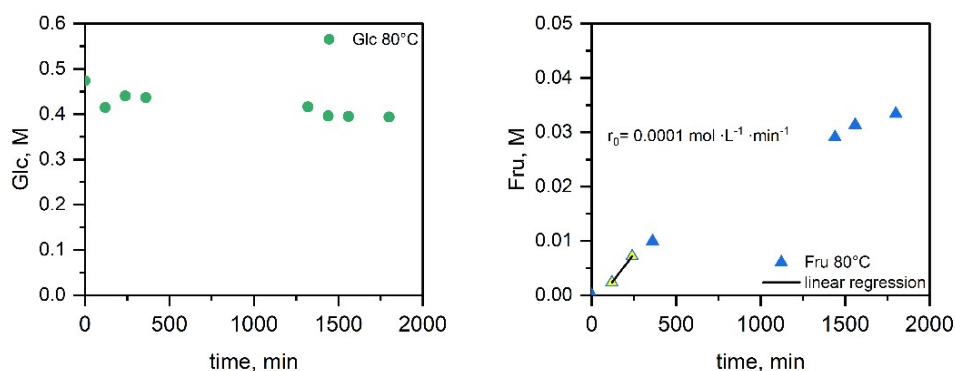

**Figure 13S.** Concentrations of Glc (green circles) and Fru (blue triangles) during the conversion of D-glucose in the presence of  $\text{BaCO}_3$  at  $80^\circ\text{C}$ . Reaction conditions: 40 mL 10 wt.% Glc aqueous solution, 4 mmol  $\text{BaCO}_3$ , 500 rpm,  $80^\circ\text{C}$ .

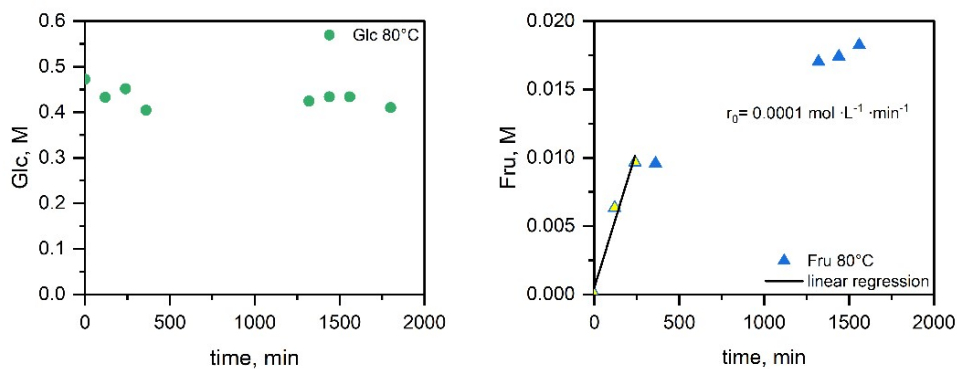

**Figure 14S.** Concentrations of Glc (green circles) and Fru (blue triangles) during the conversion of D-glucose in the presence of  $\text{Mg}_3(\text{PO}_4)_2$  at  $80^\circ\text{C}$ . Reaction conditions: 40 mL 10 wt.% Glc aqueous solution, 4 mmol  $\text{Mg}_3(\text{PO}_4)_2$ , 500 rpm,  $80^\circ\text{C}$ .

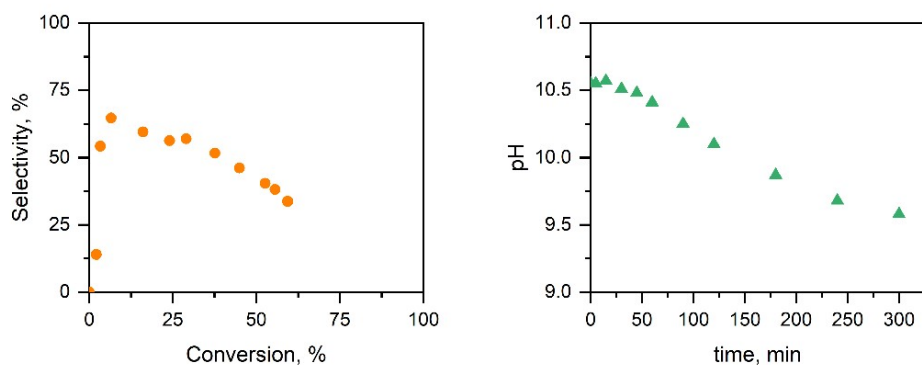

**Figure 15S.** Selectivity-conversion curve (orange circles) and pH of the solution (green triangles) as a function of time during the isomerization reaction in the presence of  $\text{Li}_2\text{CO}_3$  at  $60^\circ\text{C}$ . Reaction conditions: 40 mL 10 wt.% Glc aqueous solution, 12 mmol  $\text{Li}_2\text{CO}_3$ , 500 rpm,  $60^\circ\text{C}$ .

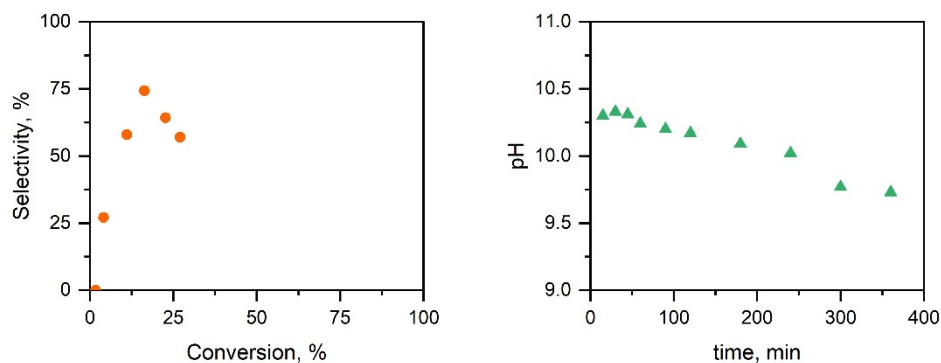

**Figure 16S.** Selectivity-conversion curve (orange circles) and pH of the solution (green triangles) during the isomerization reaction in the presence of  $\text{MgO}$  at  $60^\circ\text{C}$ . Reaction conditions: 40 ml 10 wt.% Glc aqueous solution, 4 mmol  $\text{MgO}$ , 500 rpm,  $60^\circ\text{C}$ .

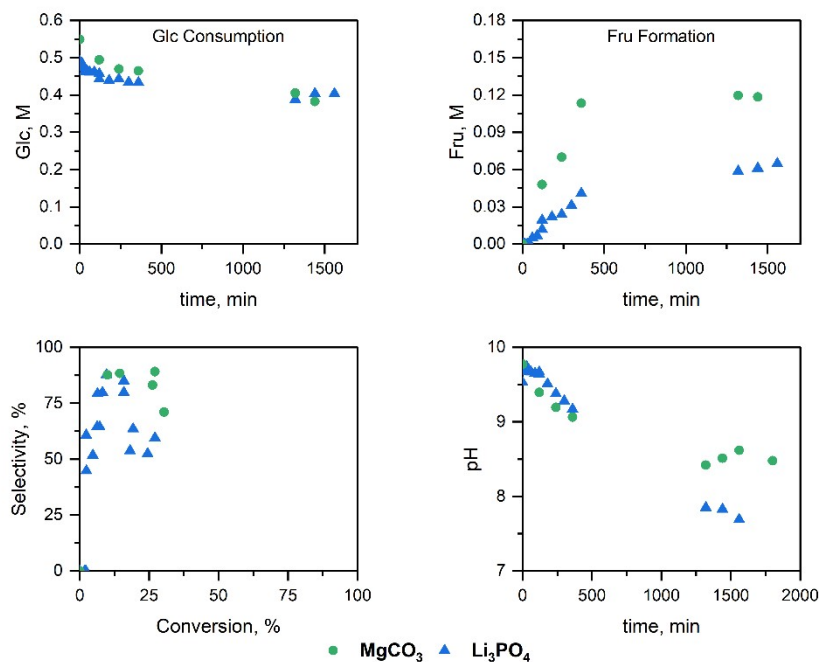

**Figure S17.** Selectivity-conversion curves and pH values during the conversion of D-glucose in the presence of  $\text{MgCO}_3$  (green circles) and  $\text{Li}_3\text{PO}_4$  (blue triangles) at  $60^\circ\text{C}$ . Reaction conditions: 40 mL 10wt.% Glc aqueous solution, 4 mmol  $\text{MgCO}_3$ , 4 mmol  $\text{Li}_3\text{PO}_4$ , 500 rpm,  $60^\circ\text{C}$ .

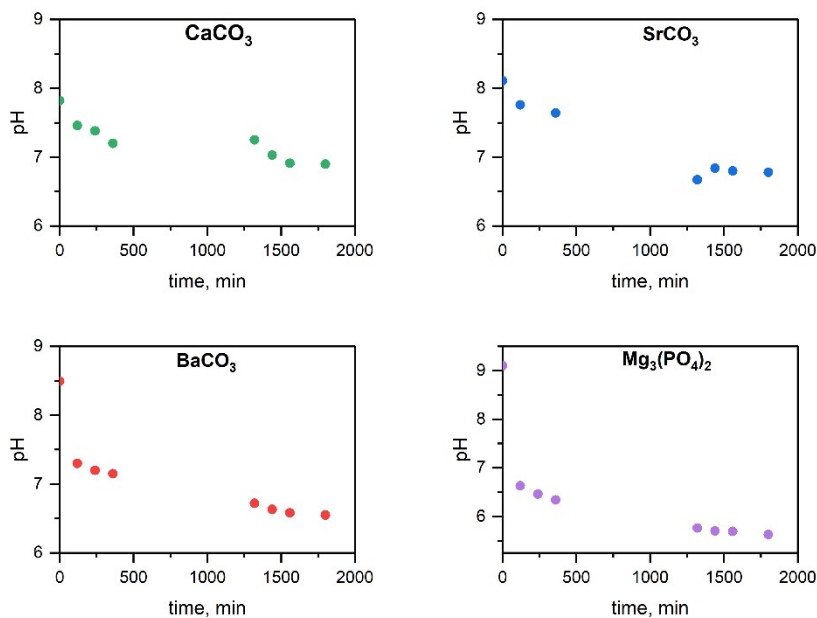

**Figure 18S.** pH of the solution as a function of time during the isomerization reaction in the presence of  $\text{CaCO}_3$  (green),  $\text{SrCO}_3$  (blue),  $\text{BaCO}_3$  (red), and  $\text{Mg}_3(\text{PO}_4)_2$  (violet) at  $80^\circ\text{C}$ . Reaction conditions: 40 mL 10 wt.% Glc aqueous solution, 4 mmol  $\text{CaCO}_3$ , 4 mmol  $\text{SrCO}_3$ , 4 mmol  $\text{BaCO}_3$ , and 8 mmol  $\text{Mg}_3(\text{PO}_4)_2$ , 500 rpm,  $80^\circ\text{C}$ .

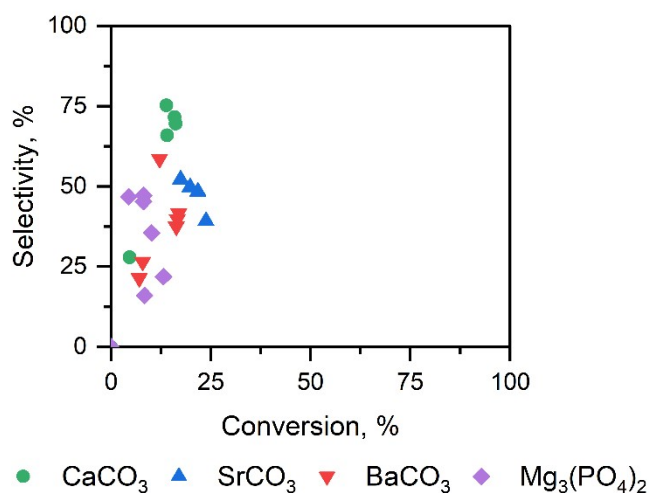

**Figure 19S.** Selectivity-conversion curves of the isomerization reaction in presence of  $\text{CaCO}_3$ ,  $\text{SrCO}_3$ ,  $\text{BaCO}_3$ , and  $\text{Mg}_3(\text{PO}_4)_2$  at  $80^\circ\text{C}$ . Reaction conditions: 40 mL 10 wt.% Glc aqueous solution, 4 mmol  $\text{CaCO}_3$ , 4 mmol  $\text{SrCO}_3$ , 4 mmol  $\text{BaCO}_3$ , or 8 mmol  $\text{Mg}_3(\text{PO}_4)_2$ , 500 rpm,  $80^\circ\text{C}$ .

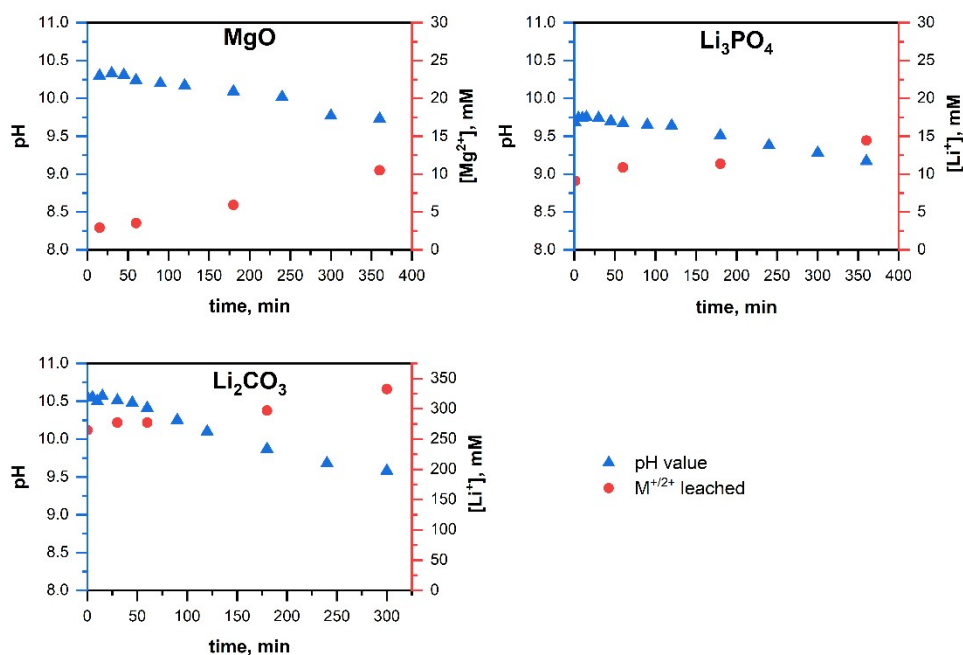

**Figure 20S.** pH values (blue triangles) and concentrations of leached metals over the course of the isomerization (red circles). Reaction conditions: 40 mL 10 wt.% Glc aqueous solution, 4 mmol  $\text{MgO}$ , 4 mmol  $\text{Li}_3\text{PO}_4$ , 12 mmol  $\text{Li}_2\text{CO}_3$ , 500 rpm,  $60^\circ\text{C}$ .

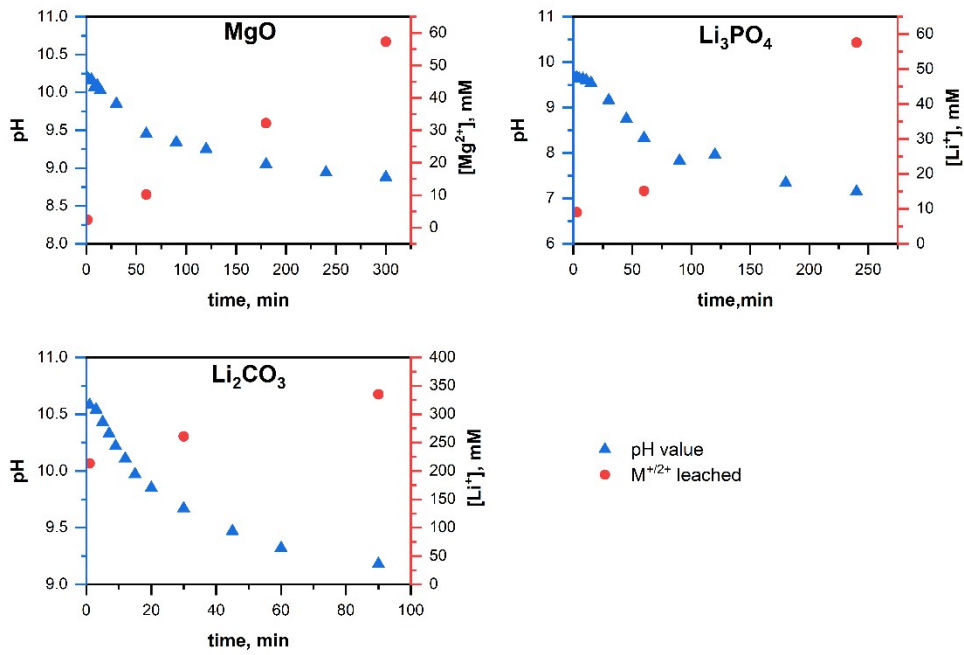

**Figure 21S.** pH values (blue triangles) and concentrations (red circles) of leached metals over the course of the isomerization. Reaction conditions: 40 mL 10 wt.% Glc aqueous solution, 4 mmol MgO, 4 mmol,  $Li_3PO_4$ , or 12 mmol  $Li_2CO_3$ , 500 rpm, 80°C.

#### 4. Filtration and contact tests

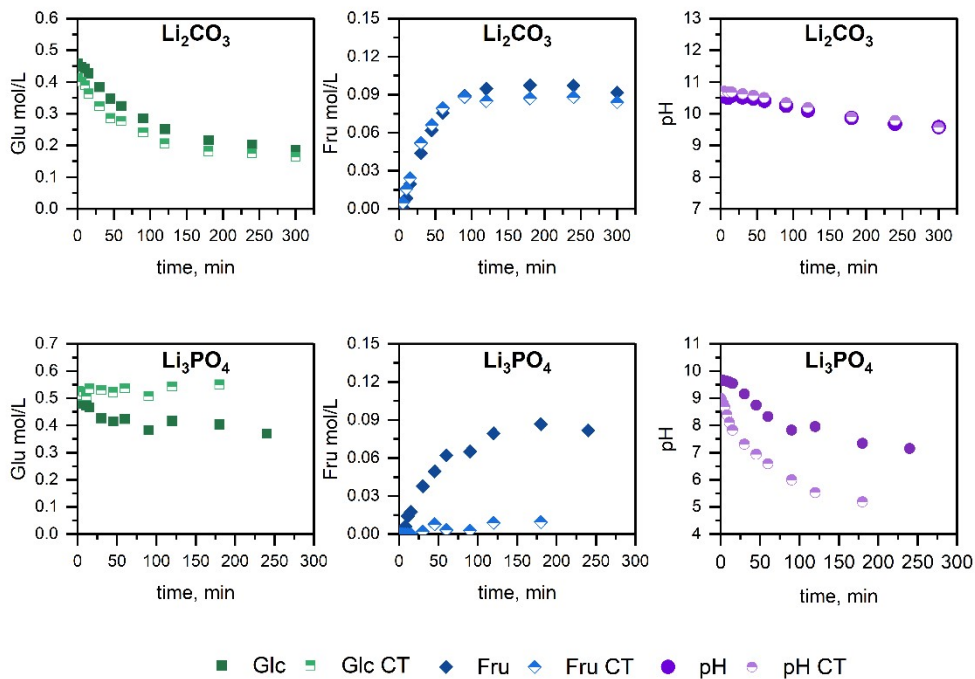

**Figure 22S.** Resultst of the contact tests in the presence of  $\text{Li}_3\text{PO}_4$  and  $\text{Li}_2\text{CO}_3$ . Reaction conditions: 40 mL 10 wt.% Glc solution, 4 mmol  $\text{Li}_3\text{PO}_4$  (80°C), 12 mmol  $\text{Li}_2\text{CO}_3$  (60°C), 500 rpm.

## 5. Recycling

## tests

**Figure 23S.** Fresh MgO cycle (middle), and the reaction in 10 wt.% Glc catalysts were washed water and acetone. 40 mL 10 wt.% Glc 60°C, 4 h, 500 rpm.

(left), MgO after the 1<sup>st</sup> 2<sup>nd</sup> cycle (right) for the solution. The used after reaction with Reaction conditions: solution, 4 mmol MgO,

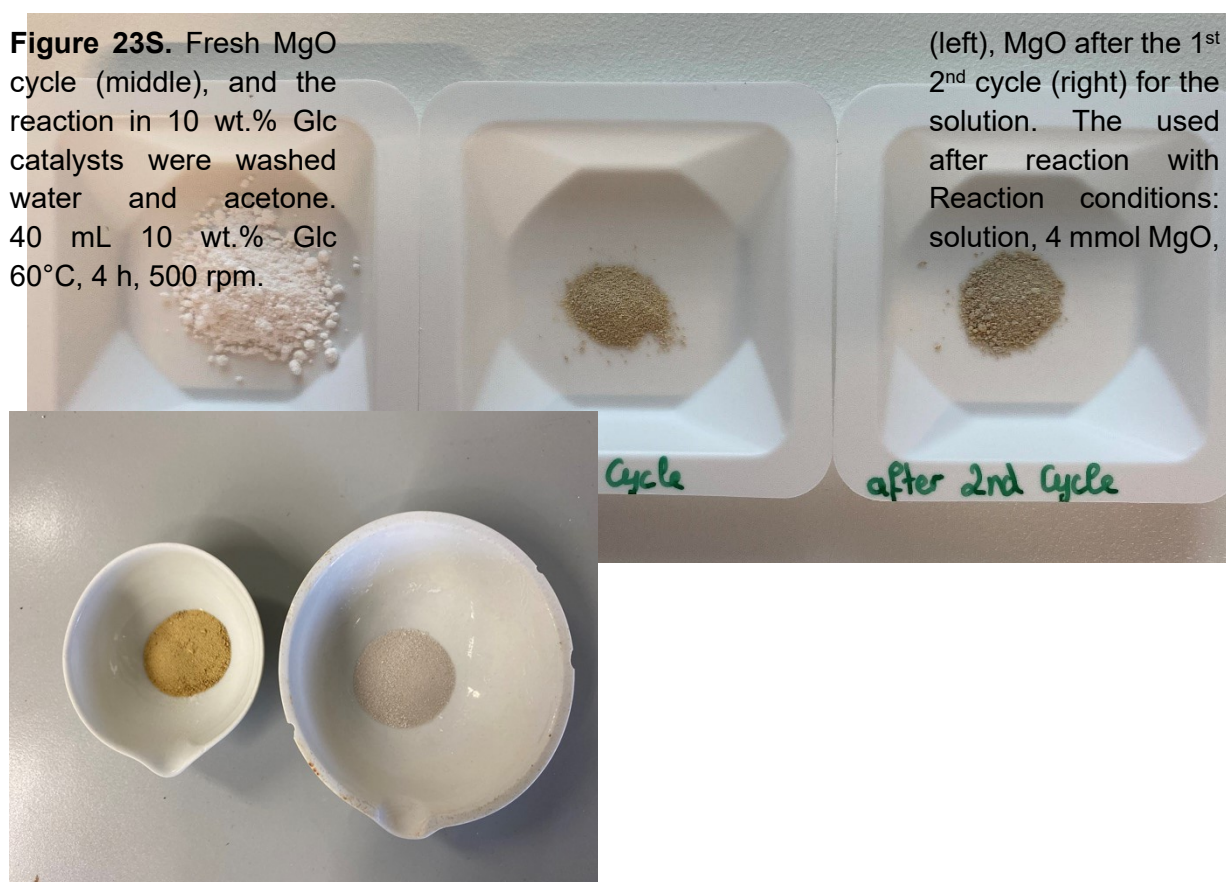

**Figure 24S.** MgO after the 1<sup>st</sup> cycle washed with water and acetone (left) after calcination (right) Reaction conditions: 40 mL 10 wt.% Glc solution, 25 mmol MgO, 80°C, 4 h, 500 rpm.



**Figure 25S.** Fresh  $\text{MgCO}_3$  (left),  $\text{MgCO}_3$  after the 1<sup>st</sup> cycle (middle), and the 2<sup>nd</sup> cycle (right) for the reaction in 10 wt.% Glc solution washed with water and acetone after reaction. Reaction conditions: 40 mL 10 wt.% Glc solution, 4 mmol  $\text{MgCO}_3$ , 80°C, 4 h, 500 rpm.

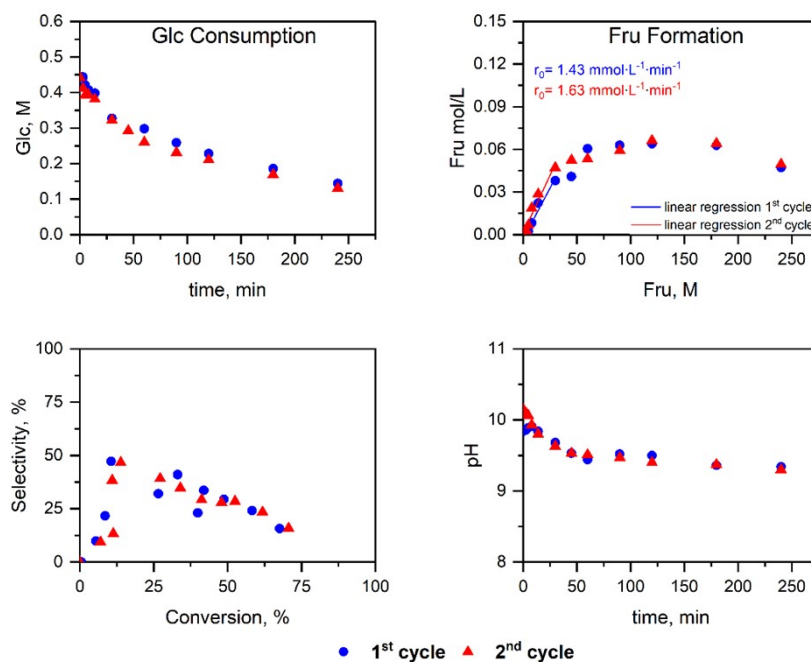

**Figure 26S.** Concentration-time curves, selectivity-conversion curves and pH values during the isomerization in the presence of  $\text{MgO}$ . Reaction condition: 40 mL 10 wt.% Glc solution, 25 mmol  $\text{MgO}$ , 4 h, 500 rpm, 80°C, calcination after 1<sup>st</sup> cycle for 3 h at 500°C ( $5 \text{ K}\cdot\text{min}^{-1}$ ).

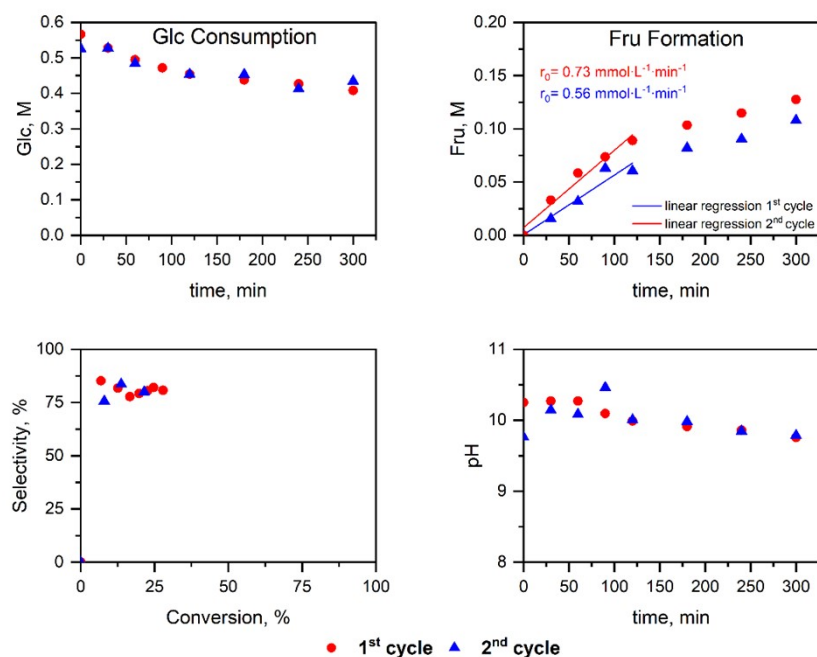

**Figure 27S.** Concentration-time curves, selectivity-conversion curves, and pH values of the isomerization in the presence of MgO. Reaction condition: 40 mL 10 wt.% Glc solution, 4 mmol MgO, 5 h, 500 rpm, 60°C, washed with water and acetone after the 1<sup>st</sup> cycle.

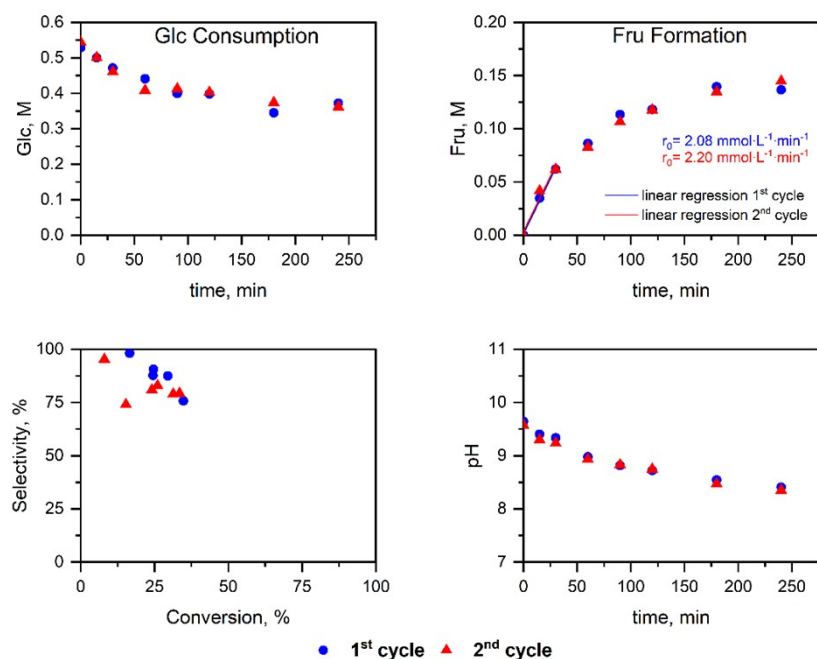

**Figure 28S.** Concentration-time curves, selectivity-conversion curves and pH values of the isomerization in the presence MgCO<sub>3</sub>. Reaction condition: 40 mL 10 wt.% Glc solution, 4 mmol MgCO<sub>3</sub>, 4 h, 500 rpm, 80°C.

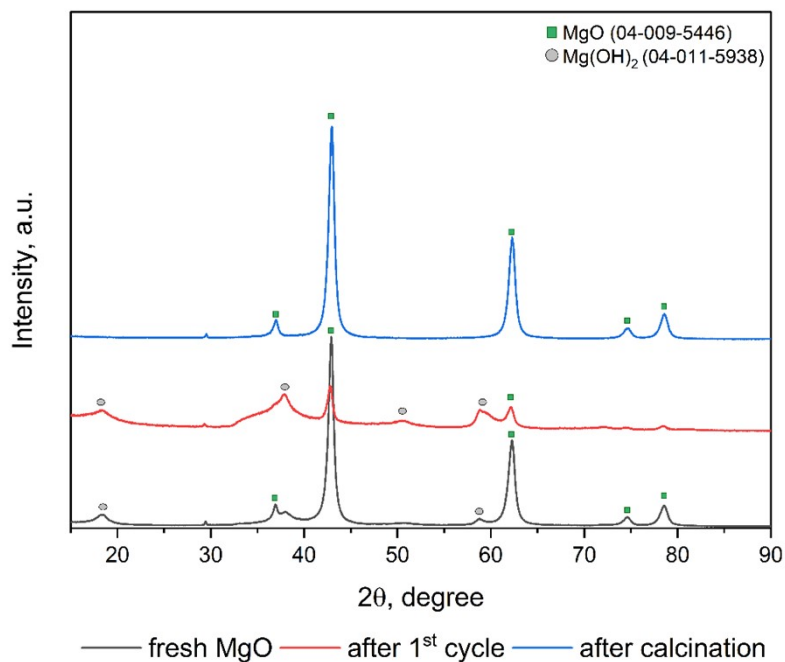

**Figure S29.** XRD patterns of fresh MgO (black), after the 1<sup>st</sup> cycle (red) and after calcination (blue). Reaction conditions: 40 mL 10 wt.% Glc solution, 4 mmol MgO, 4 h, 500 rpm, 60°C, after reaction washing with water and acetone + calcination for 3 h at 500°C (5 K·min<sup>-1</sup>). ICDD (International Centre for Diffraction Data) codes are given in parentheses.

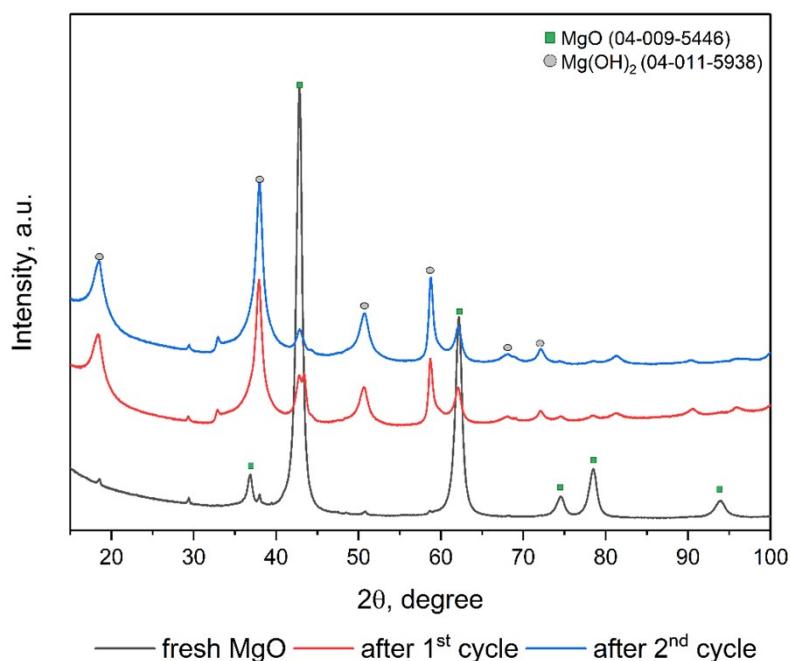

**Figure S30.** XRD patterns of MgO before catalysis (fresh, black), after the 1<sup>st</sup> cycle (red) and after the 2<sup>nd</sup> cycle (blue). Reaction conditions: 40 mL 10 wt.% Glc solution, 4 mmol MgO, 4 h, 500 rpm, 60°C. The catalyst was washed after reaction with water and acetone. ICDD (International Centre for Diffraction Data) codes are given in parentheses.

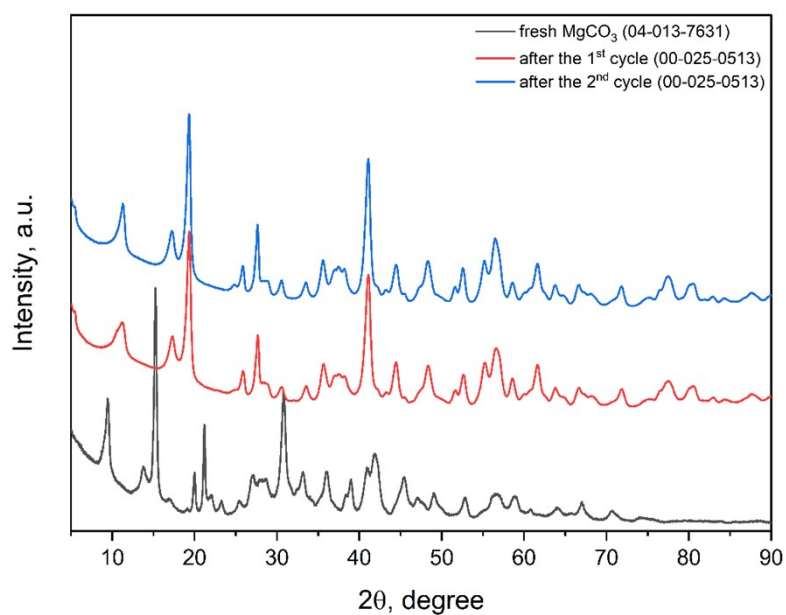

**Figure S31.** XRD patterns of MgCO<sub>3</sub> before catalysis (fresh, black), after the 1<sup>st</sup> cycle (red) and after the 2<sup>nd</sup> cycle (blue). Reaction conditions: 40 mL 10 wt.% Glc solution, 4 mmol MgCO<sub>3</sub>, 4 h, 500 rpm, 60°C. The catalyst was washed after reaction with water and acetone. ICDD (International Centre for Diffraction Data) codes are given in parentheses.

## 6. References

[1] S. Yalkowsky, Y. He, J. Parijat, Handbook of Aqueous Solubility Data, CRC Press, Taylor & Francis, London, UK., 2016.
